# Supplementary material for: Quaternary Ammonium Salts Based on (-)-Borneol as Effective Inhibitors of Influenza Virus
Source: Research Square preprint supplement (doi:10.21203/rs.3.rs-246928/v1), 2021-02-25

**Quaternary Ammonium Salts Based on (-)-Borneol as Effective Inhibitors of Influenza Virus**

Anastasiya S. Sokolova,*a Оlga I. Yarovayaa, Darya V. Baranovaa, Anastasia V. Galochkinab, Anna A. Shtroc, Sophia S. Borisevichd, Yuriy V. Gatilova, Vladimir V. Zarubaevb, Nariman F. Salakhutdinova

*aN.N. Vorozhtsov Novosibirsk Institute of Organic Chemistry, Siberian Branch, Russian Academy of Sciences, Lavrentjev Avenue 9, 630090 Novosibirsk, Russia*

*bPasteur Institute of Epidemiology and Microbiology, 14 Mira str., 197101 St. Petersburg, Russia*

*cDepartment of Chemotherapy, Influenza Research Institute, 15/17 Prof. Popova St., 197376 St. Petersburg, Russia*

*dLaboratory of Chemical Physics, Ufa Institute of Chemistry Ufa Federal Research Center, 71 Pr. Oktyabrya, 450078, Ufa, Russia*

Corresponding author: *Dr. Anastasiya S. Sokolova, Ph.D., tel.: +7-383-330-88-70, e-mail: [asokolova@nioch.nsc.ru](mailto:asokolova@nioch.nsc.ru)

SUPPORTING INFORMATION

NMR 1H and 13C spectra of the compounds **6**, **7**, **10a, 10c, 11a, 11b**

Compound 6


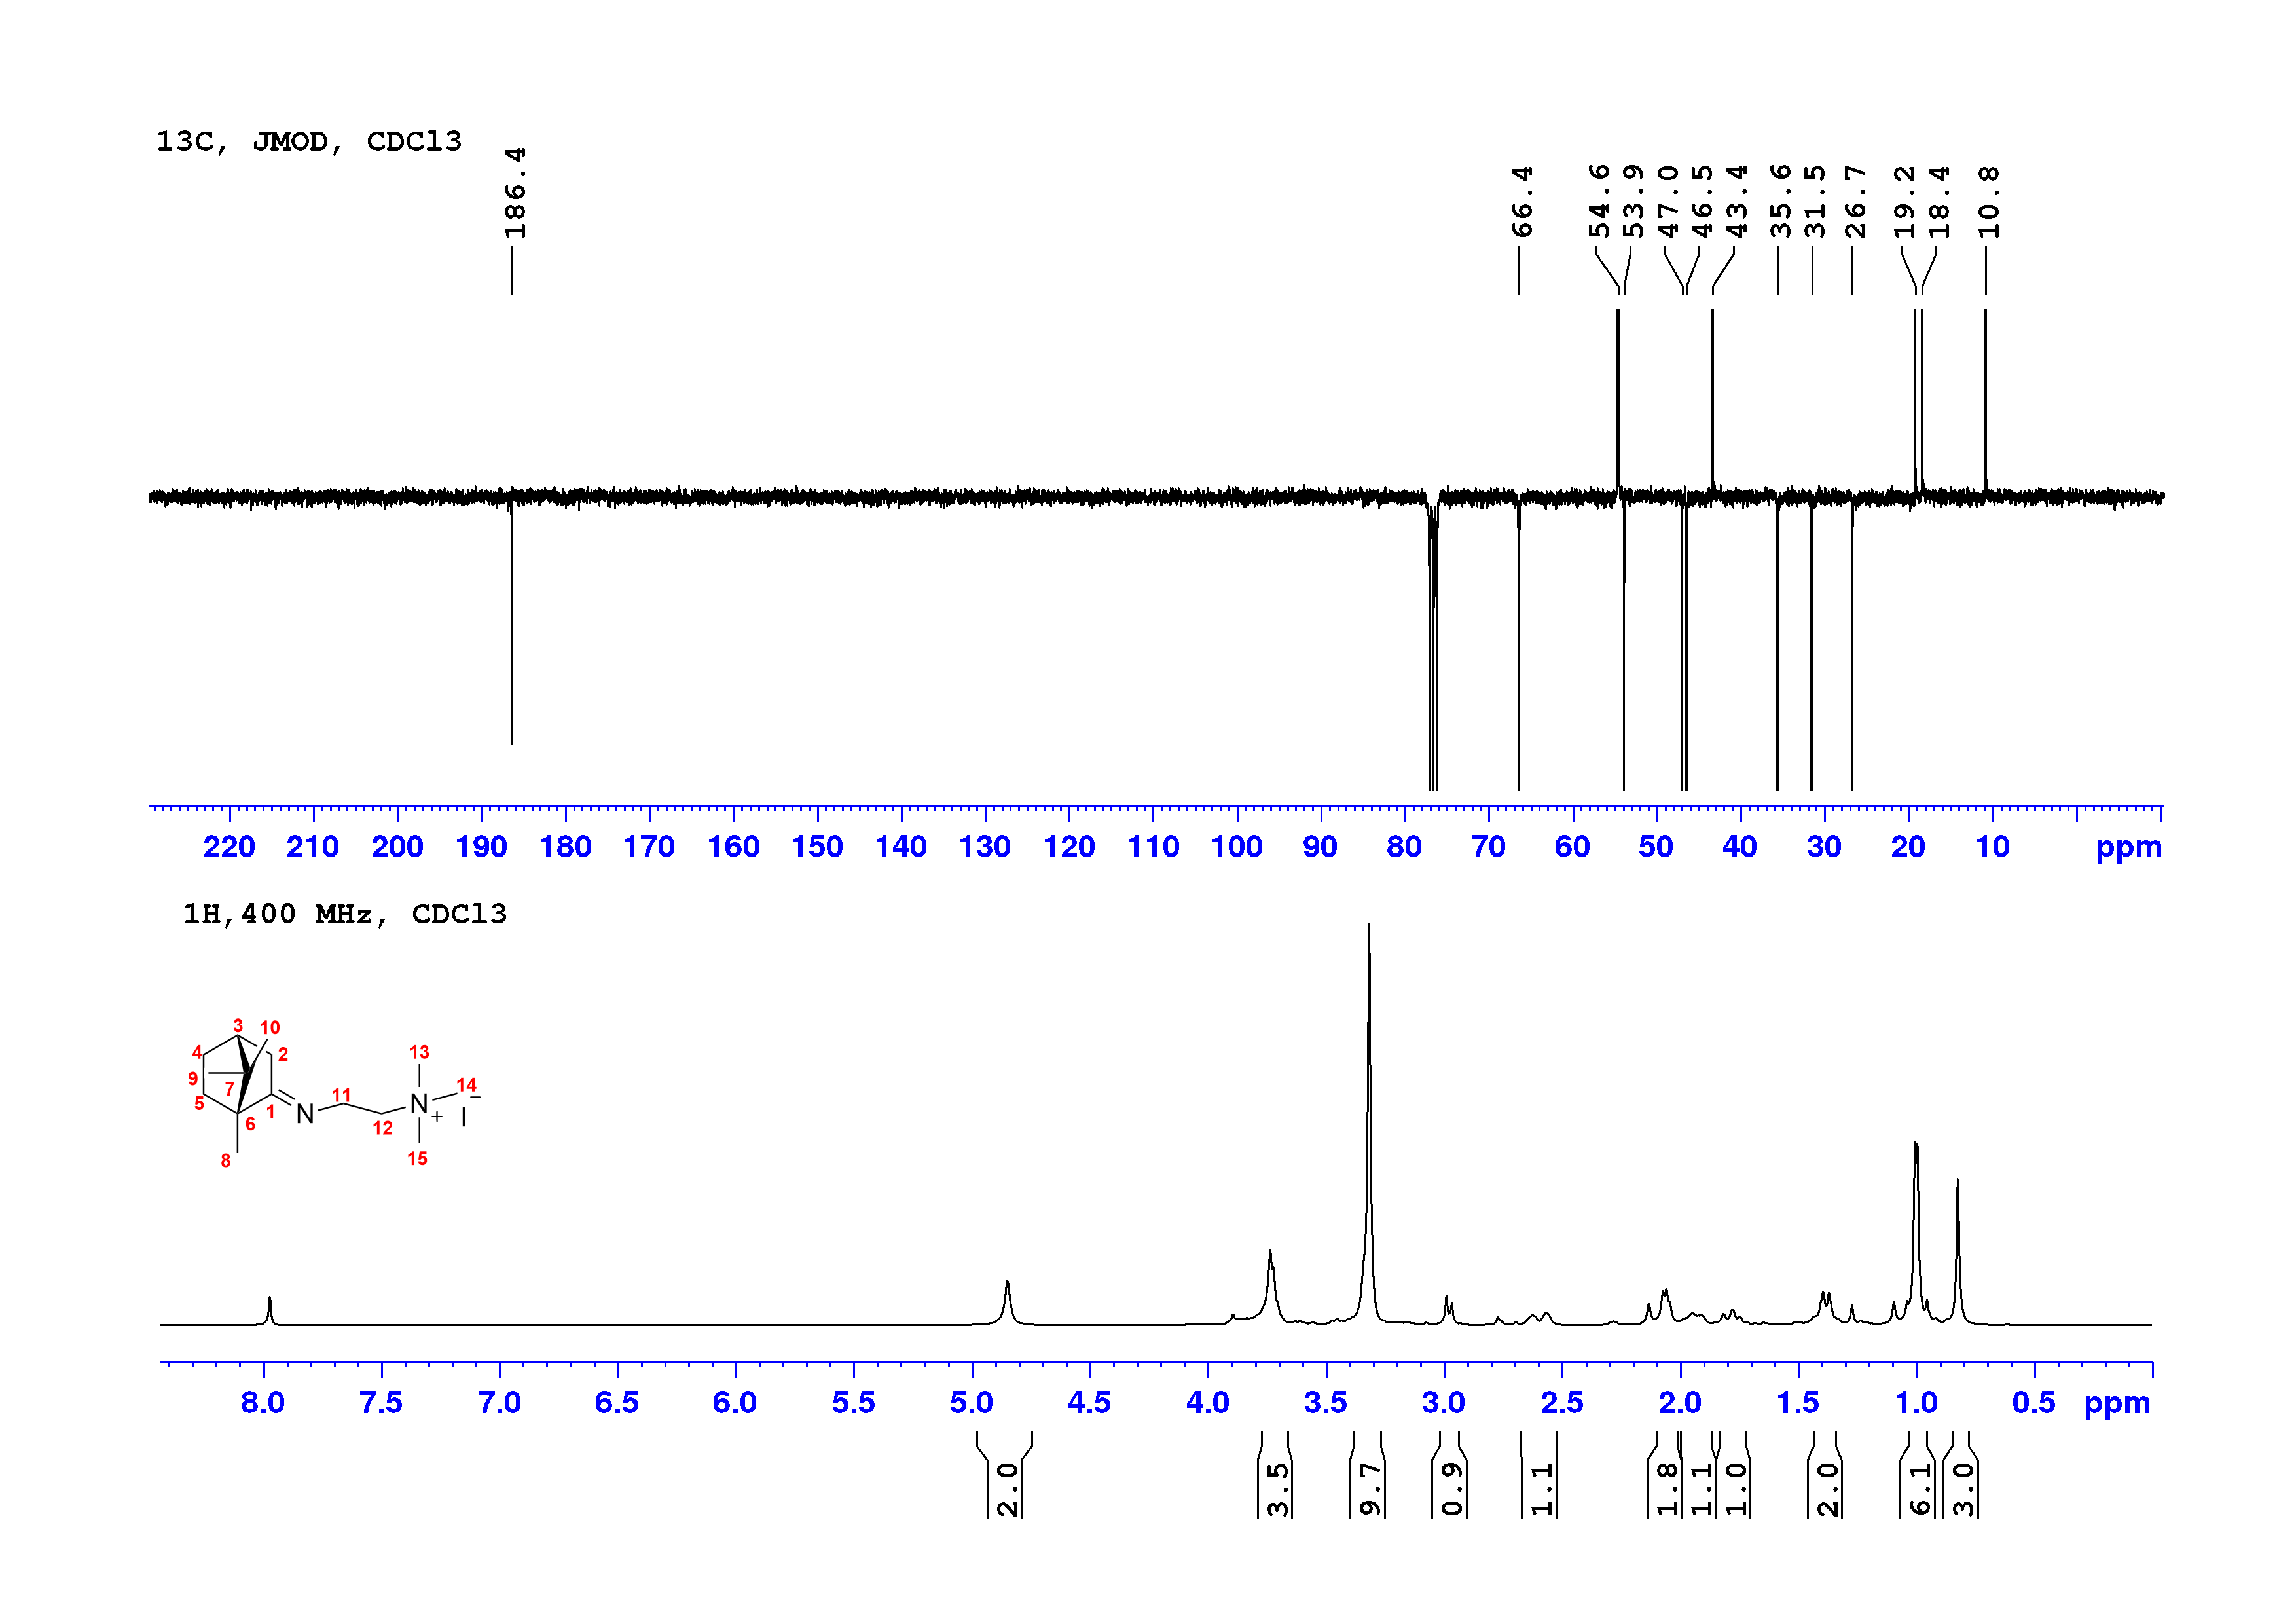


Compound 7


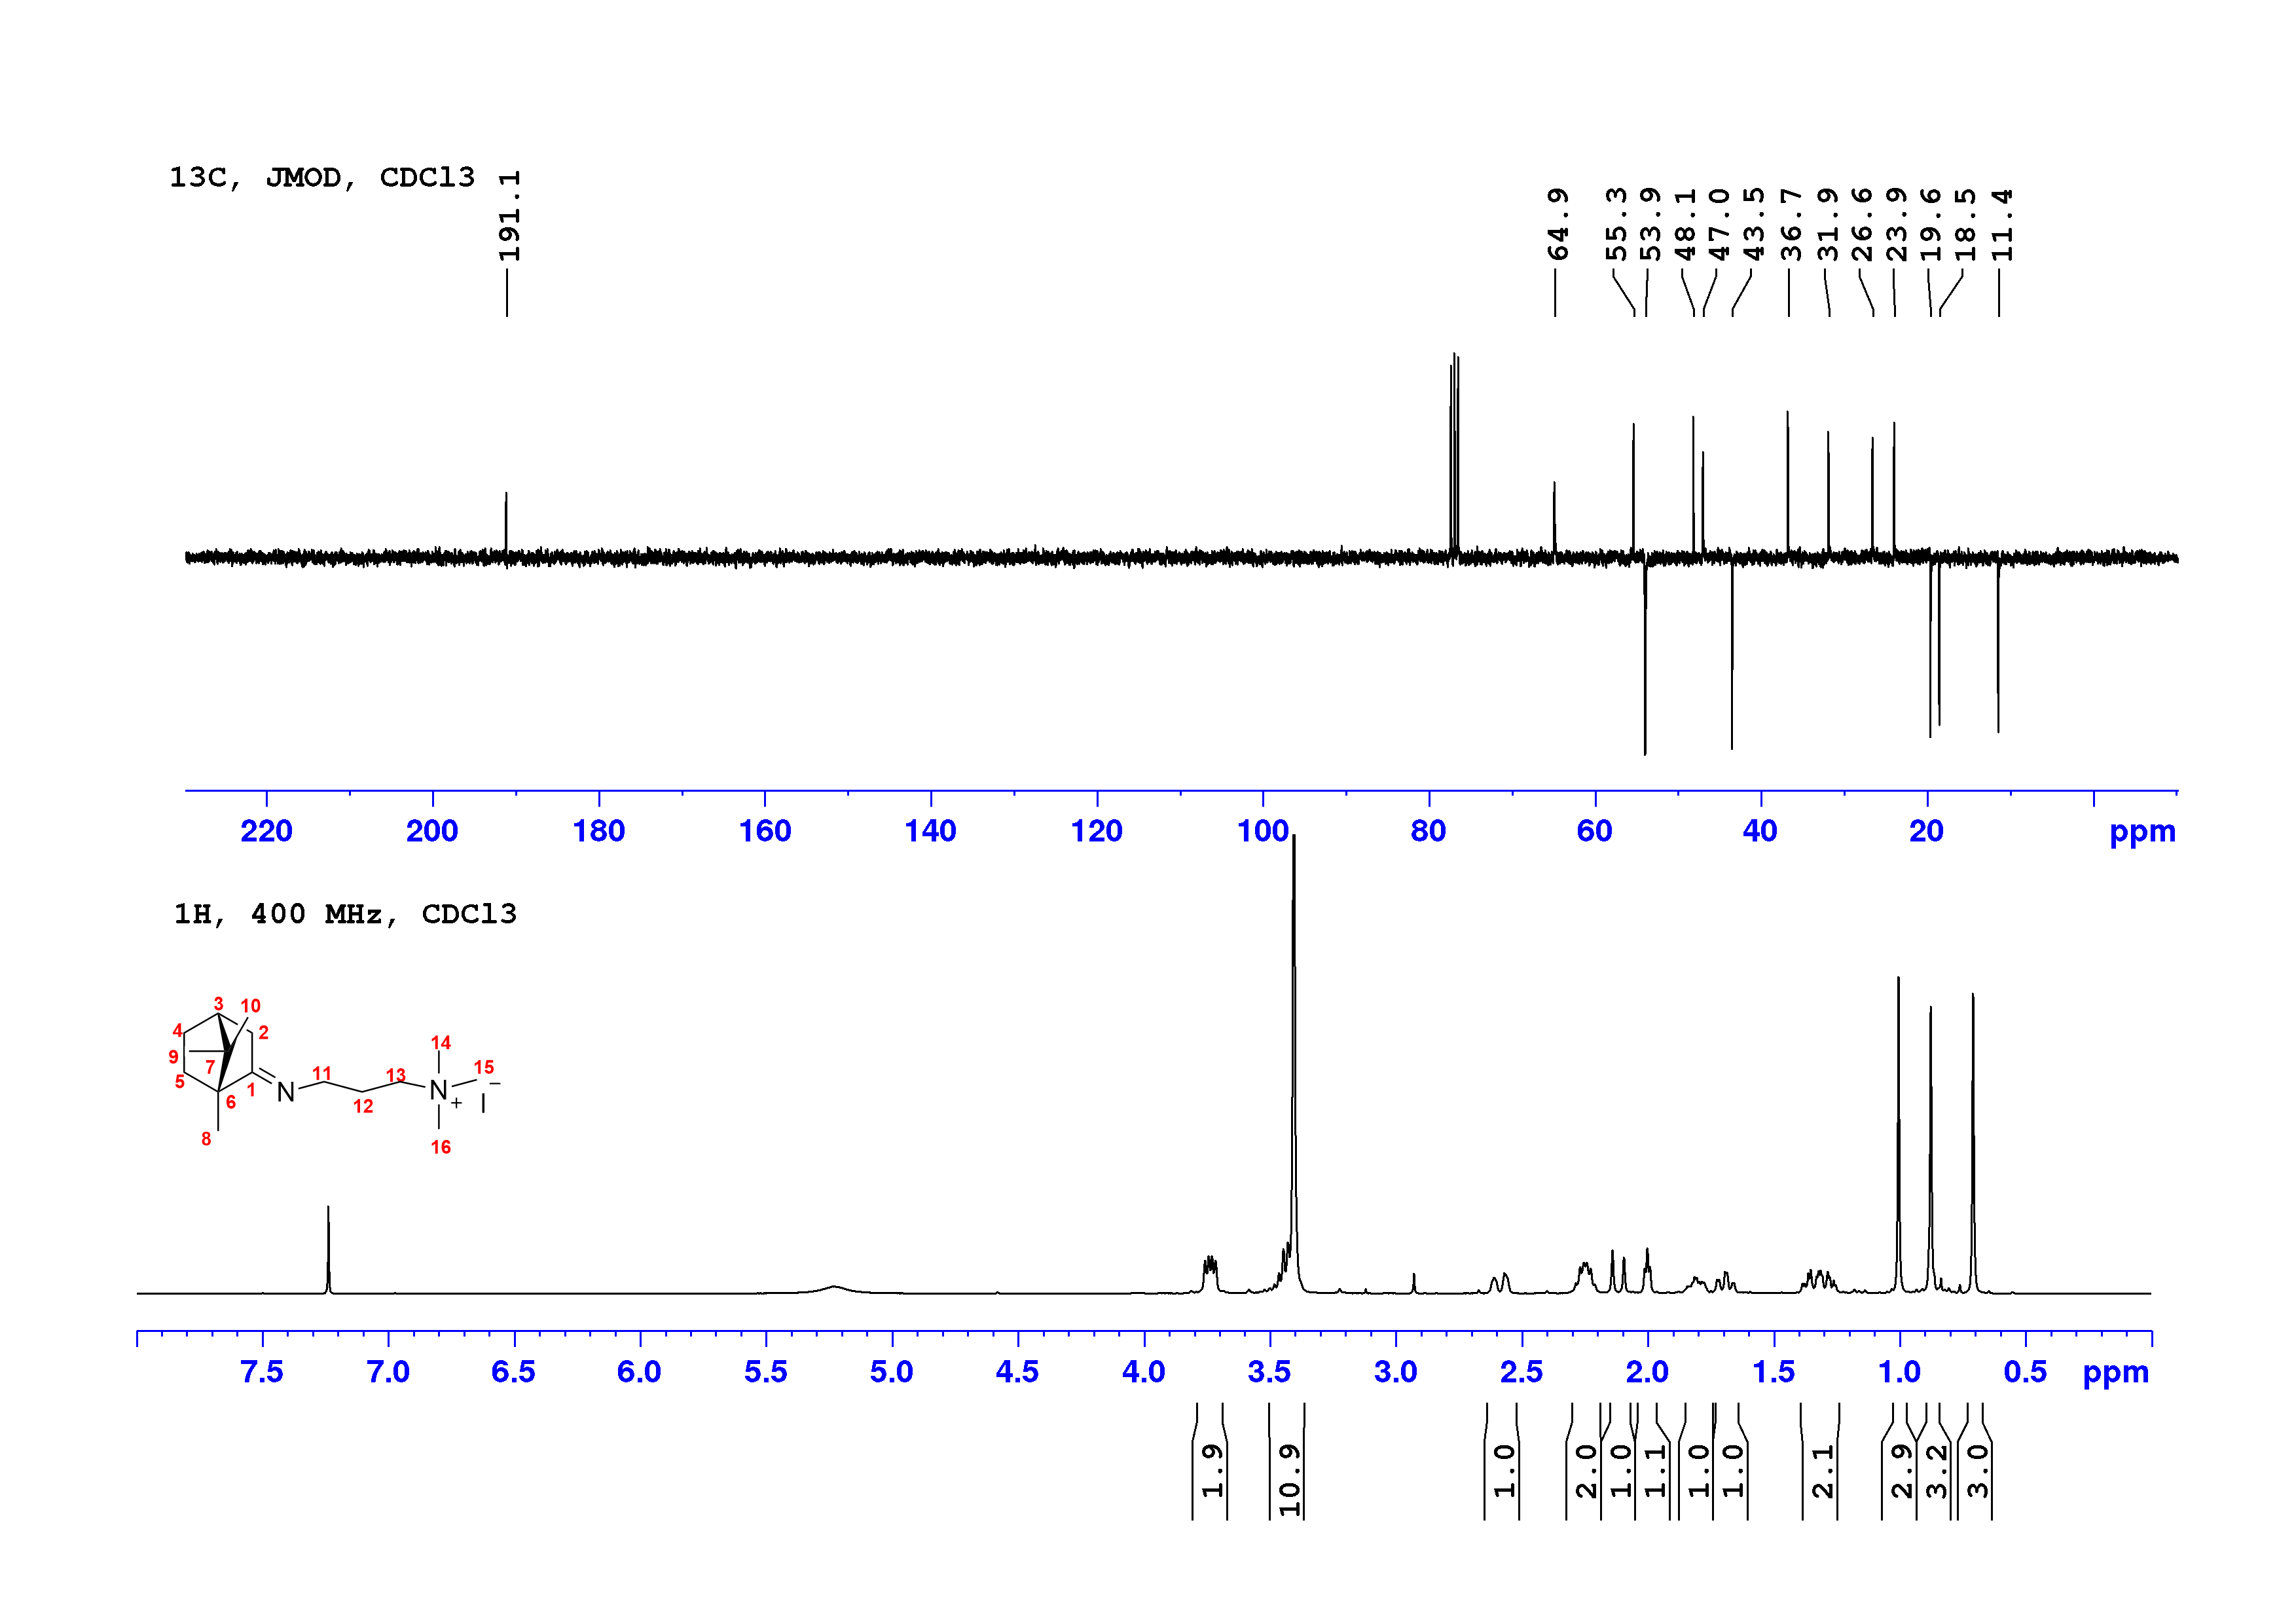


Compound 10a


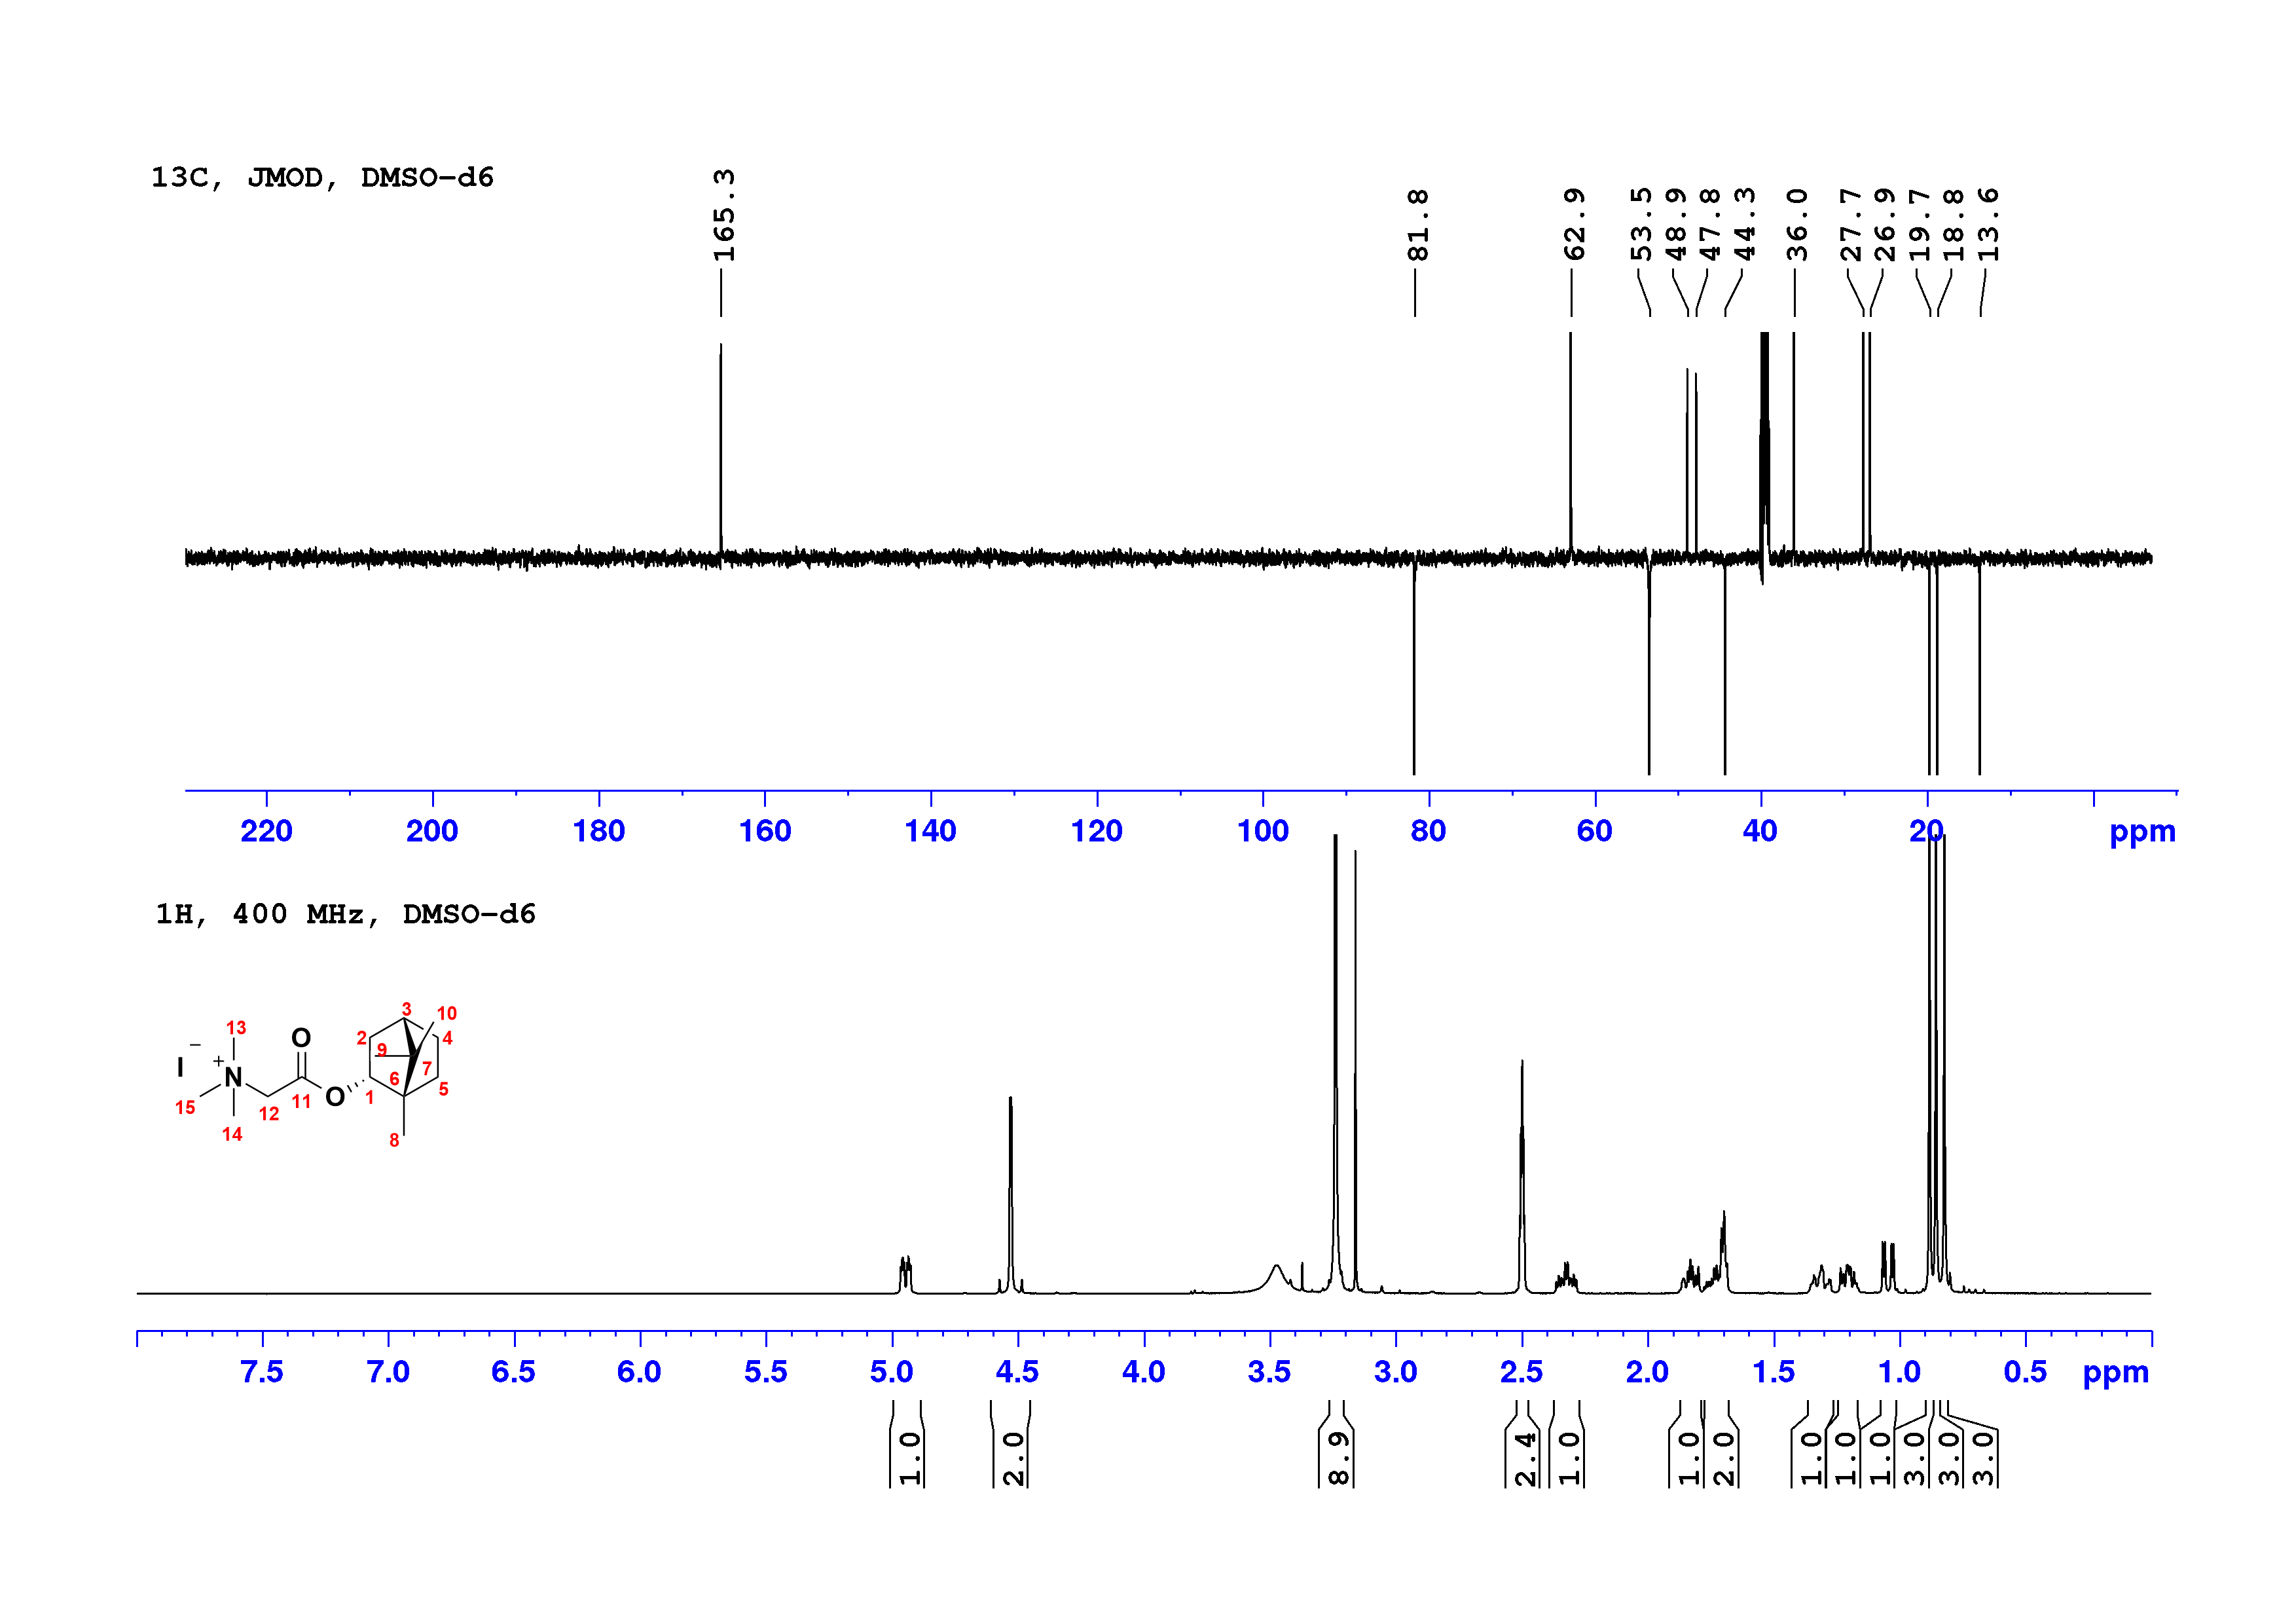


Compound 10c


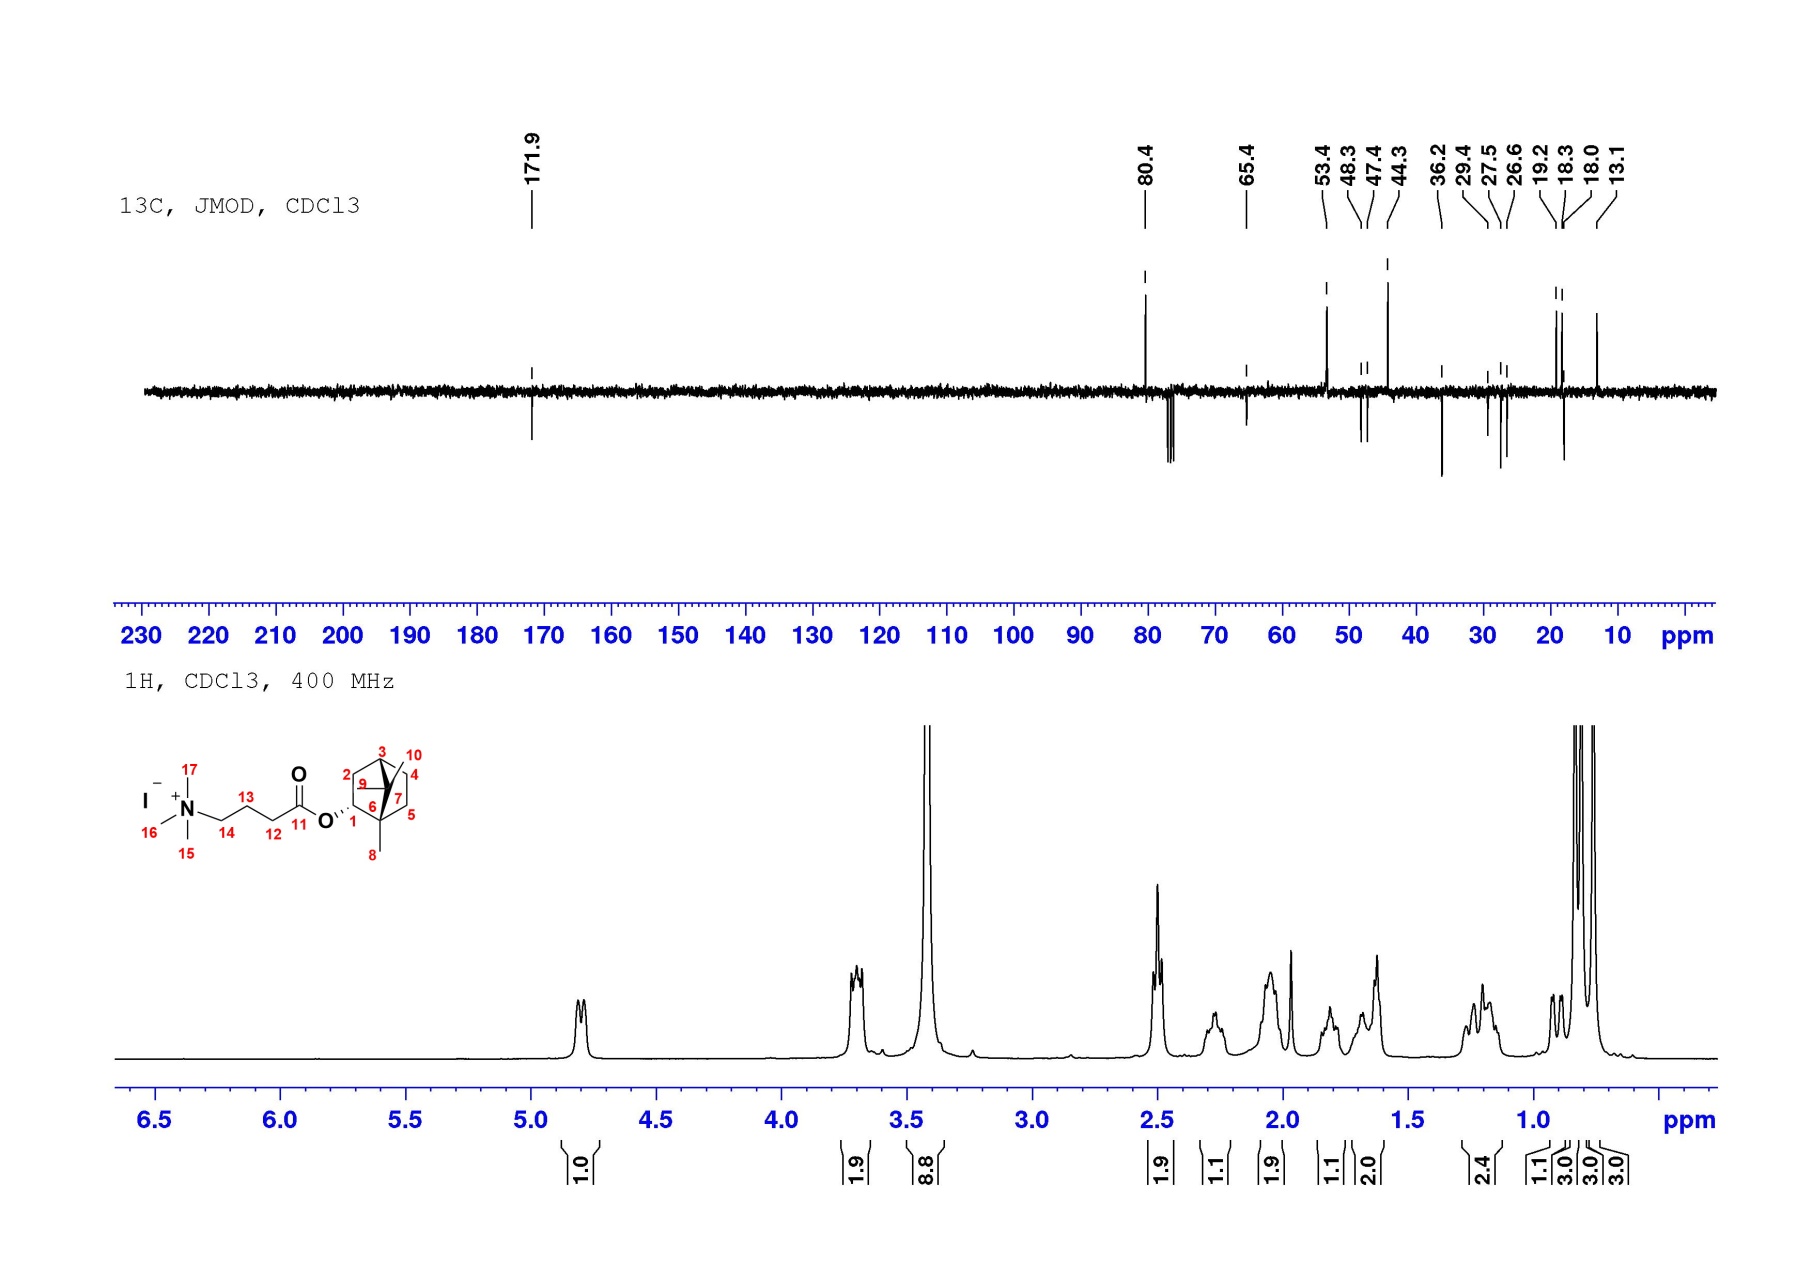


Compound 11a


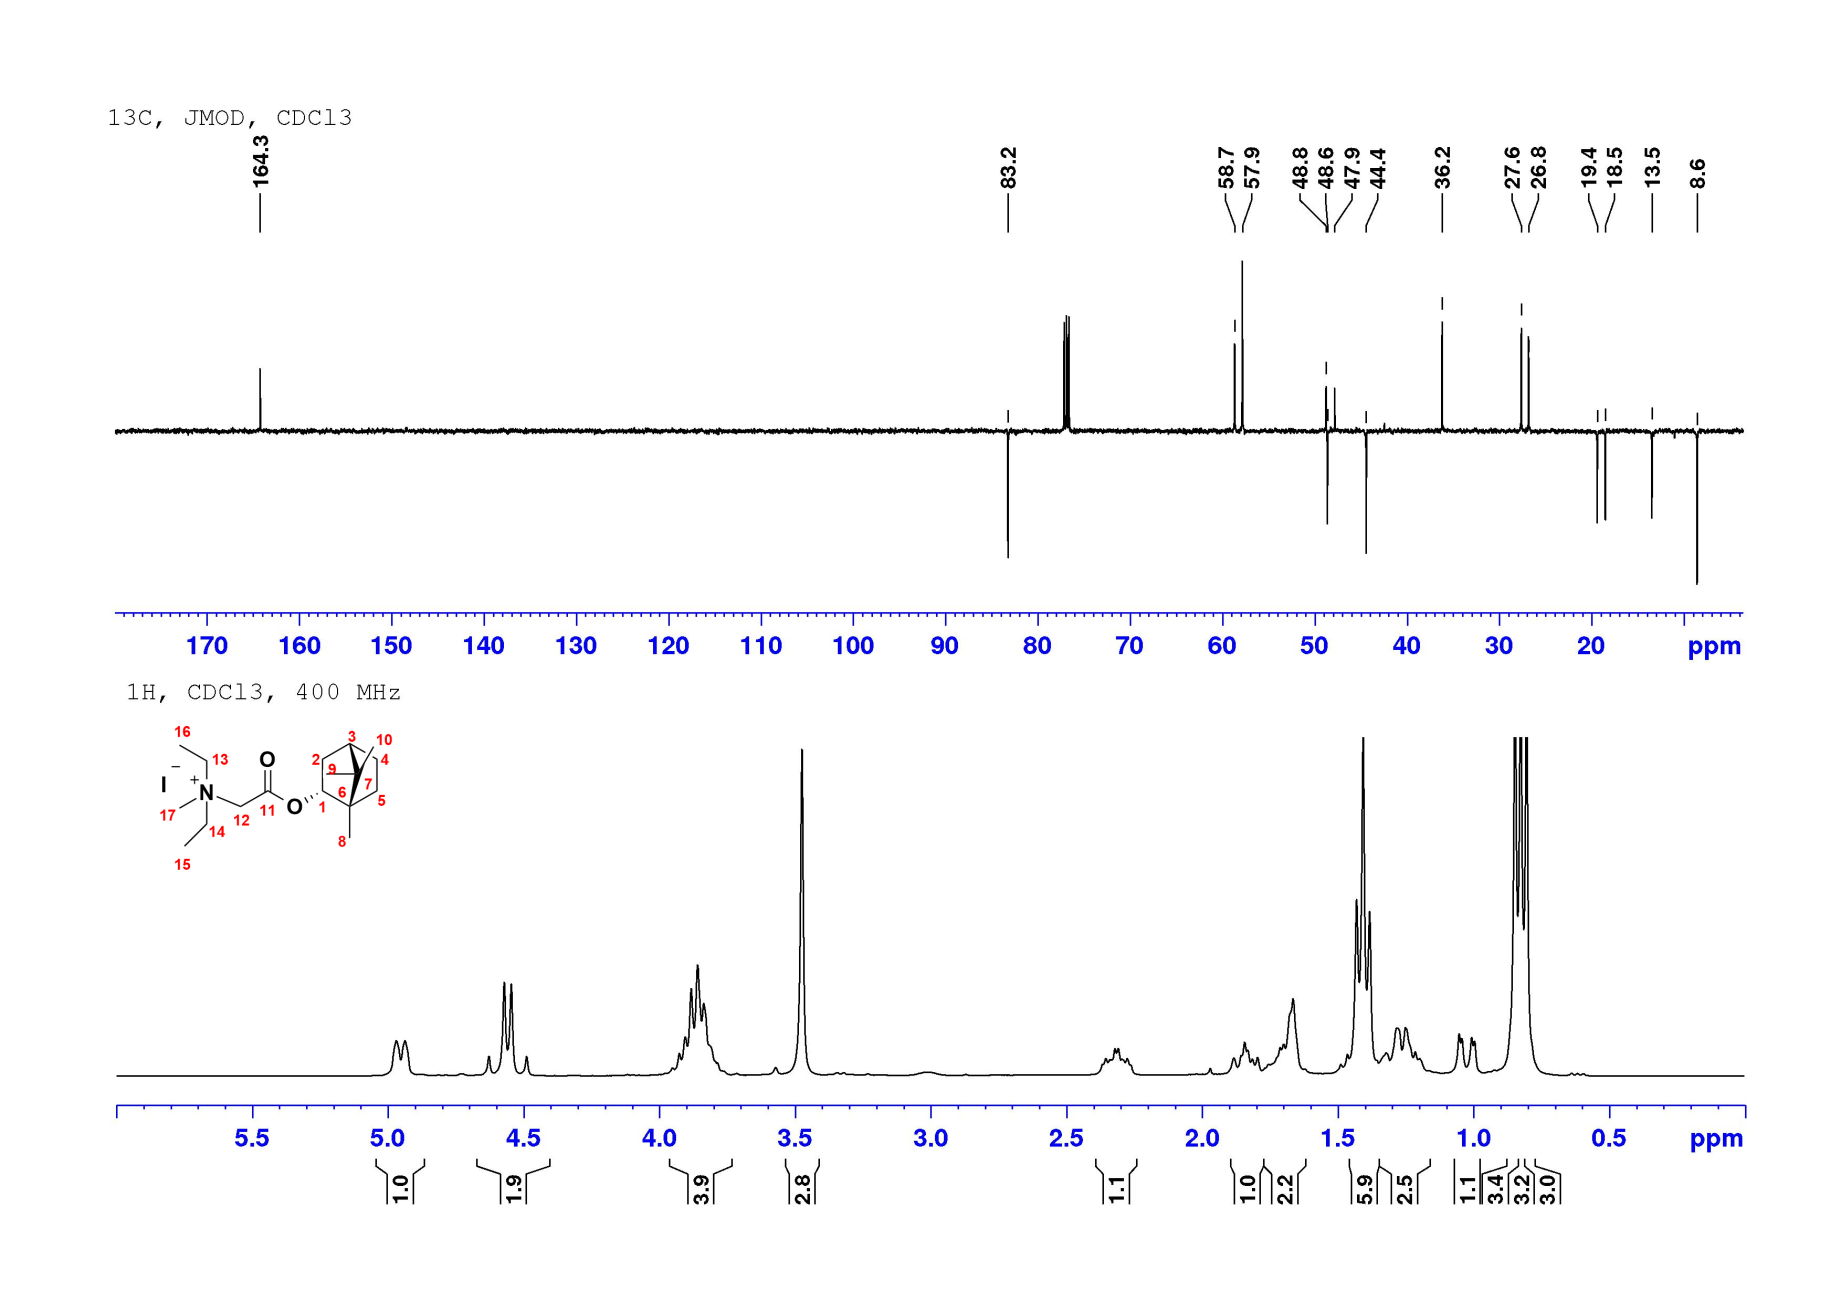


Compound 11b


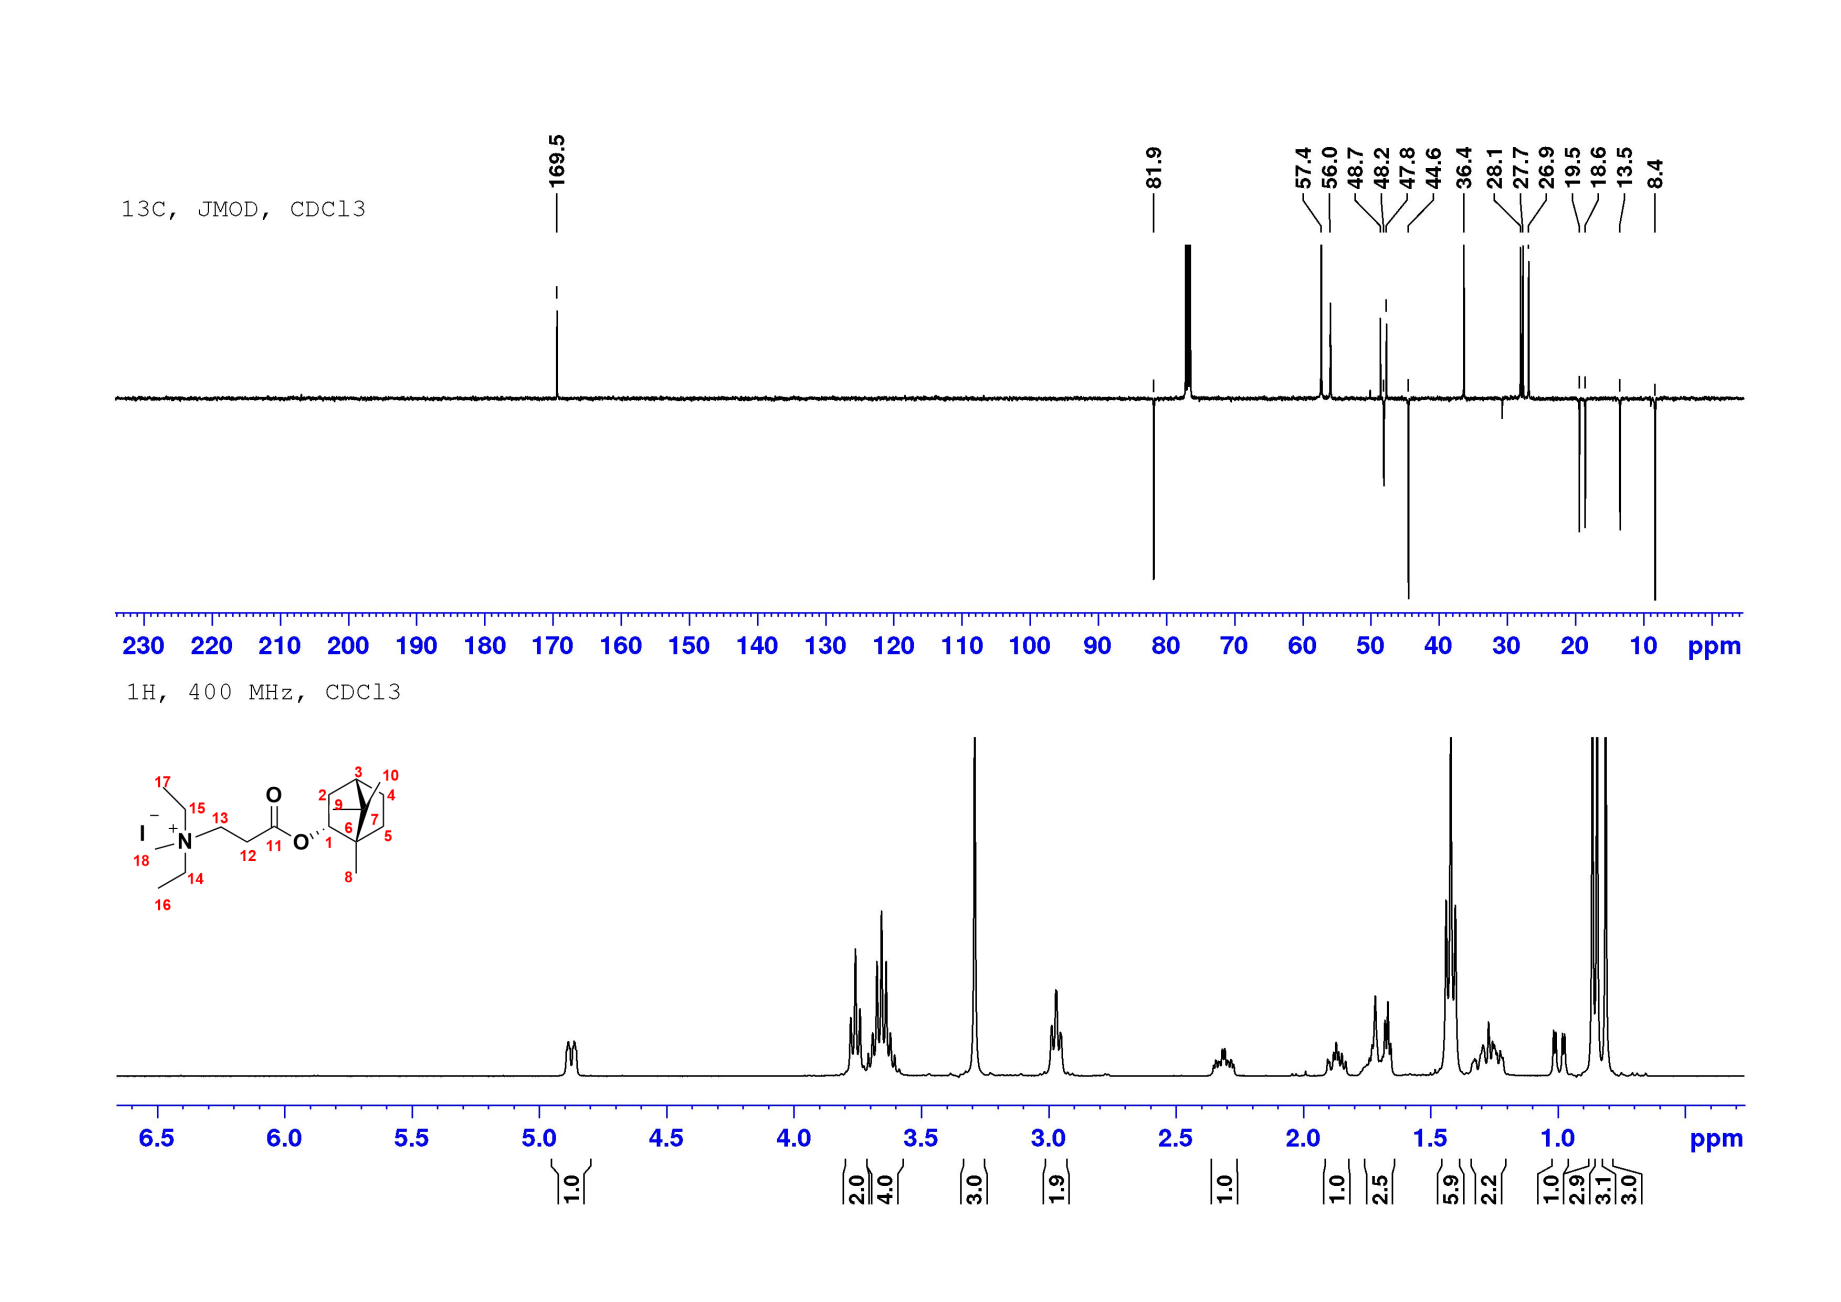

Supplement: Supplementary file 1 [file 5f61b2a6f369781658d59f3e.docx]
